# Supplementary material
Source: Springer Nature journal article supplement (https://www.springermedizin.de/resource/supplementary/13075_2013_4126_MOESM7_ESM.pdf/9696124)

**A**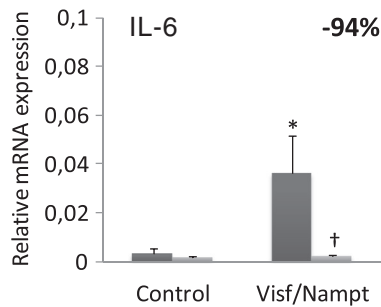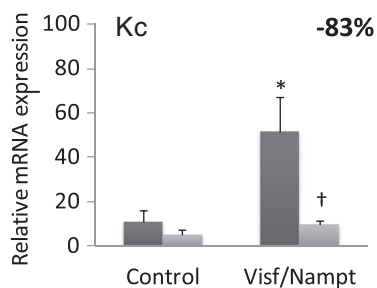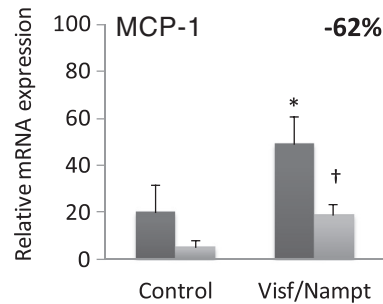**B**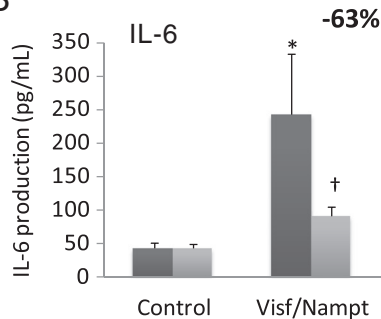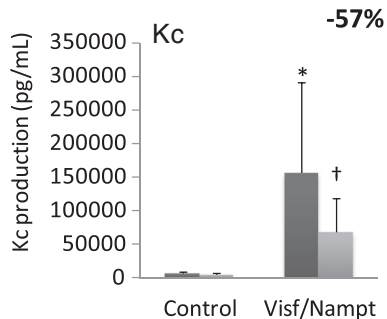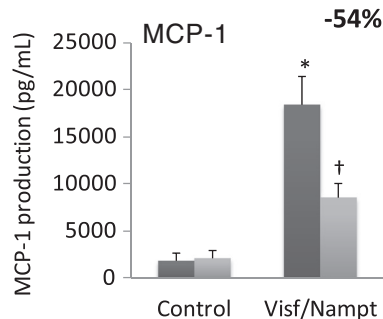

Control APO866 10nM

Supplement: MOESM7 [file 9696124]
